# Supplementary material for: Genetic and non-genetic determinants of thymic epithelial cell number and function
Source: PubMed Central journal article supplement (PMC5583284; doi:10.1038/s41598-017-10746-8), 2017-09-04
Supplement: 41598_2017_10746_MOESM1_ESM.pdf [file 41598_2017_10746_MOESM1_ESM.pdf]

**Supplementary Information for**

Genetic and non-genetic determinants of thymic epithelial cell number and function

Daisuke Nagakubo, Brigitte Krauth and Thomas Boehm

Supplementary Figure 1

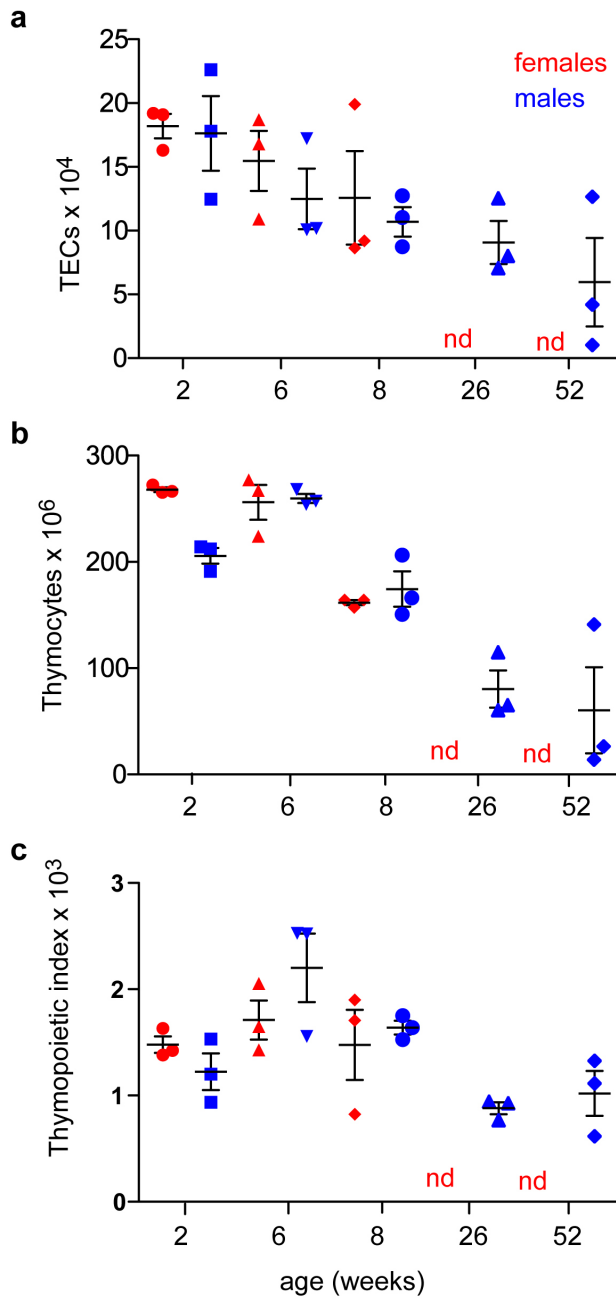

**Supplementary Figure 1. Time-dependent changes in thymopoietic characteristics in C57BL/6 mice. (a)** Number of thymic epithelial cells (TECs). **(b)** Number of CD45<sup>+</sup> thymocytes. **(c)** Thymopoietic indices, calculated as thymocyte/TEC ratios. Results for female mice are shown in red, those for male mice in blue; means±s.e.m.

**Supplementary Table 1. Antibodies and staining reagents for flow cytometry**

| <b>Antigen/Reagent</b> | <b>Clone</b>         | <b>Conjugate</b>                | <b>Supplier</b>           |
|------------------------|----------------------|---------------------------------|---------------------------|
| CD3                    | 145-2C11             | APC                             | eBioscience               |
| CD4                    | GK1.5                | FITC                            | BioLegend                 |
| CD8a                   | 53-6.7               | PE                              | eBioscience               |
| CD19                   | 1D3                  | PE Cy7                          | eBioscience               |
| CD44                   | IM7                  | PE                              | BD Bioscience             |
| CD45                   | 30-F11               | PE Cy7                          | BioLegend                 |
| CD62L                  | MEL-14               | FITC                            | eBioscience               |
| EpCAM                  | G8.8                 | APC                             | BioLegend                 |
| Ly51                   | 6C3                  | PE                              | eBioscience               |
| mouse IgG1             | goat polyclonal      | biotin                          | SouthernBiotech           |
| mouse IgG (H+L)        | rat polyclonal       | FITC                            | Jackson<br>ImmunoResearch |
| rabbit IgG (H+L)       | goat polyclonal      | Alexa Fluor 488                 | Invitrogen                |
| rat IgG (H+L)          | donkey<br>polyclonal | Cy3                             | Jackson<br>ImmunoResearch |
| Streptavidin           | -                    | Cy3, Cy5                        | Jackson<br>ImmunoResearch |
| Streptavidin           | -                    | FITC, PE or Alexa<br>Fluor v450 | eBioscience               |
| UEA-1                  | -                    | biotin, FITC                    | Vector Laboratories       |
